# Supplementary material
Source: PubMed Central journal article supplement (PMC5340323)
Supplement: 1063TableS3.pdf [file 1063TableS3.pdf]

| Estimator      | Relationship |      |      |      |      |
|----------------|--------------|------|------|------|------|
|                | FS           | HS   | C1   | C2   | C3   |
| $\hat{\Phi}_D$ | 4.11         | 4.10 | 3.82 | 3.75 | 3.53 |
| $\hat{\Phi}_G$ | 4.30         | 4.12 | 3.81 | 3.80 | 3.66 |
| $\hat{\Phi}_R$ | 3.94         | 3.89 | 3.63 | 3.66 | 3.50 |
| $\hat{\Phi}_T$ | 4.00         | 4.04 | 3.79 | 3.82 | 3.66 |

**Table S3** Simulation study estimates of the ratio of empirical standard deviations with those computed under a no-LD assumption.
