# Supplementary material
Source: PubMed Central journal article supplement (PMC5340323)
Supplement: 1063TableS4.pdf [file 1063TableS4.pdf]

| Estimator         | Relationship |       |       |      |      |       |
|-------------------|--------------|-------|-------|------|------|-------|
|                   | FS           | HS    | C1    | C2   | C3   | IN    |
| $\hat{\Phi}_P$    | 4.09         | 5.83  | 6.71  | 7.84 | 6.88 | 33.29 |
| $\hat{\Phi}_M$    | 3.76         | 4.43  | 4.51  | 4.17 | 3.03 | 14.05 |
| $\hat{\Phi}_D$    | 7.78         | 7.98  | 7.66  | 7.65 | 7.22 | 8.06  |
| $\hat{\Phi}_G$    | 7.49         | 6.07  | 5.17  | 4.76 | 4.47 | 6.51  |
| $\hat{\Phi}_R$    | 6.05         | 5.42  | 4.96  | 4.88 | 4.64 | 6.11  |
| $\hat{\Phi}_T$    | 5.46         | 5.32  | 4.94  | 4.76 | 4.47 | 6.05  |
| $\hat{\Phi}_N$    | 7.52         | 5.88  | 4.89  | 4.35 | 4.06 | 6.39  |
| $\hat{\Phi}_K$    | 6.58         | 5.13  | 4.47  | 3.66 | 3.29 | 6.93  |
| $\hat{\Phi}_W$    | 3.97         | 3.25  | 2.76  | 2.67 | 2.53 | 5.29  |
| $\hat{\Phi}_L$    | 5.10         | 3.45  | 4.05  | 1.67 | 0.93 | 9.13  |
| $\hat{\Phi}_{LW}$ | 5.26         | 3.56  | 4.16  | 1.74 | 0.91 | 9.22  |
| $\hat{\Phi}_H$    | 4.41         | 4.21  | 3.75  | 2.76 | 2.50 | 5.32  |
| $\hat{\Phi}_{HW}$ | 3.91         | 3.54  | 3.21  | 2.25 | 2.01 | 4.97  |
| $\Psi$            | 19.47        | 13.12 | 10.95 | 5.76 | 2.70 | 16.19 |

**Table S4** Square root of MSE ( $\times 10^3$ ). The GRM estimates are unconstrained.
