# Supplementary material
Source: PubMed Central journal article supplement (PMC5340323)
Supplement: 1063TableS6.pdf [file 1063TableS6.pdf]

| Estimator      | Relationship |      |       |       |        |      |
|----------------|--------------|------|-------|-------|--------|------|
|                | FS           | HS   | C1    | C2    | C3     | IN   |
| $\hat{\Phi}_D$ | 3.12         | 6.38 | 12.34 | 49.55 | 187.68 | 7.33 |
|                | 3.12         | 6.38 | 12.34 | 47.90 | 144.48 | 7.33 |
| $\hat{\Phi}_G$ | 3.00         | 4.85 | 8.32  | 30.83 | 116.22 | 5.92 |
|                | 3.00         | 4.85 | 8.32  | 30.42 | 95.98  | 5.92 |
| $\hat{\Phi}_R$ | 2.42         | 4.33 | 7.99  | 31.64 | 120.56 | 5.56 |
|                | 2.42         | 4.33 | 7.99  | 31.19 | 99.20  | 5.56 |
| $\hat{\Phi}_T$ | 2.19         | 4.26 | 7.96  | 30.84 | 116.24 | 5.50 |
|                | 2.19         | 4.26 | 7.96  | 30.43 | 96.01  | 5.50 |
| $\hat{\Phi}_N$ | 3.01         | 4.70 | 7.87  | 28.20 | 105.46 | 5.82 |
|                | 3.01         | 4.70 | 7.87  | 27.98 | 88.58  | 5.82 |
| $\hat{\Phi}_K$ | 2.64         | 4.10 | 7.21  | 23.74 | 85.57  | 6.31 |
|                | 2.64         | 4.10 | 7.21  | 23.69 | 72.58  | 6.31 |
| $\hat{\Phi}_W$ | 1.59         | 2.60 | 4.44  | 17.33 | 65.60  | 4.82 |
|                | 1.59         | 2.60 | 4.44  | 17.33 | 56.70  | 4.82 |

**Table S6** Estimation accuracies from simulation study as measured by the ratio ( $\times 10^2$ ) of the square root of MSE and the average realized kinship. For each GRM estimator, the top row shows results from unconstrained estimates. The bottom row shows results from estimates constrained to the natural range of  $[0, 1]$ .
