# Supplementary material
Source: PubMed Central journal article supplement (PMC5340323)
Supplement: 1063TableS7.pdf [file 1063TableS7.pdf]

| Estimator      | Relationship |      |      |       |        |      |
|----------------|--------------|------|------|-------|--------|------|
|                | FS           | HS   | C1   | C2    | C3     | IN   |
| $\hat{\Phi}_D$ | 1.40         | 2.87 | 6.10 | 24.76 | 101.21 | 5.49 |
| $\hat{\Phi}_G$ | 1.31         | 2.25 | 4.36 | 17.24 | 72.83  | 4.83 |
| $\hat{\Phi}_R$ | 1.21         | 2.22 | 4.49 | 18.49 | 78.06  | 4.85 |
| $\hat{\Phi}_T$ | 1.11         | 2.14 | 4.32 | 17.32 | 72.89  | 4.82 |
| $\hat{\Phi}_W$ | 1.40         | 2.24 | 4.26 | 15.14 | 63.24  | 4.79 |
| $\hat{\Phi}_H$ | 2.39         | 4.46 | 7.60 | 22.59 | 81.02  | 5.55 |

**Table S7** Estimation accuracies from simulation study (European ancestry) as measured by the ratio ( $\times 10^2$ ) of the square root of MSE and the average realized kinship.
