# Supplementary material
Source: PubMed Central journal article supplement (PMC5340323)
Supplement: 1063TableS8.pdf [file 1063TableS8.pdf]

| Estimator      | Relationship |      |      |       |       |      |
|----------------|--------------|------|------|-------|-------|------|
|                | FS           | HS   | C1   | C2    | C3    | IN   |
| $\hat{\Phi}_D$ | 1.32         | 2.68 | 5.63 | 22.28 | 90.47 | 5.27 |
| $\hat{\Phi}_G$ | 1.26         | 2.02 | 3.76 | 14.12 | 59.52 | 4.67 |
| $\hat{\Phi}_R$ | 1.00         | 1.80 | 3.66 | 14.82 | 62.81 | 4.58 |
| $\hat{\Phi}_T$ | 0.92         | 1.77 | 3.63 | 14.10 | 59.56 | 4.60 |
| $\hat{\Phi}_W$ | 1.26         | 1.98 | 3.76 | 12.97 | 54.25 | 4.78 |
| $\hat{\Phi}_H$ | 1.09         | 1.75 | 2.63 | 6.27  | 21.74 | 3.97 |

**Table S8** Estimation accuracies from simulation study (African ancestry) as measured by the ratio ( $\times 10^2$ ) of the square root of MSE and the average realized kinship.
